# Supplementary material for: Very low prevalence of ultrasound-detected tenosynovial abnormalities in healthy subjects throughout the age range: OMERACT ultrasound minimal disease study
Source: HighWire-hosted journal article supplement (doi:10.1136/annrheumdis-2021-219931), 2021-08-18

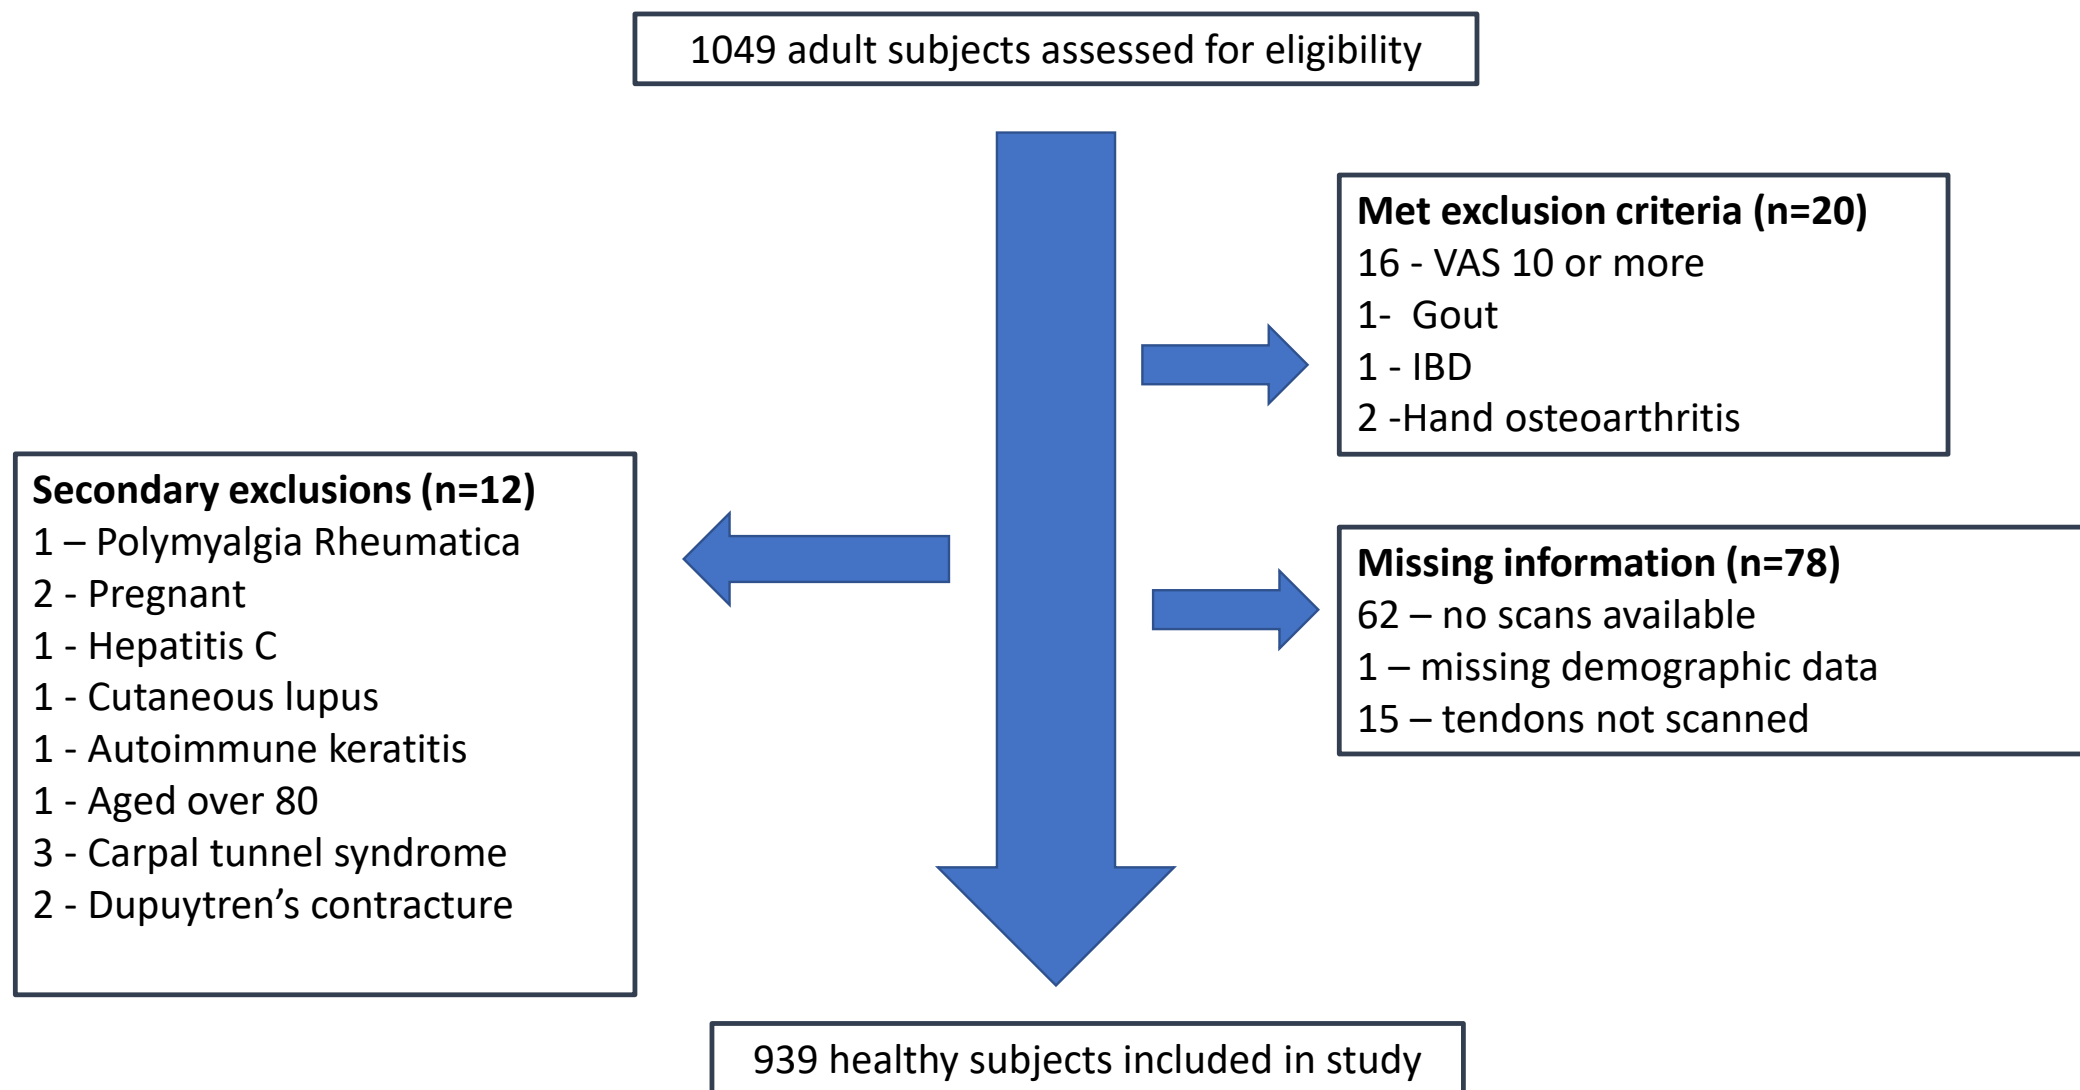

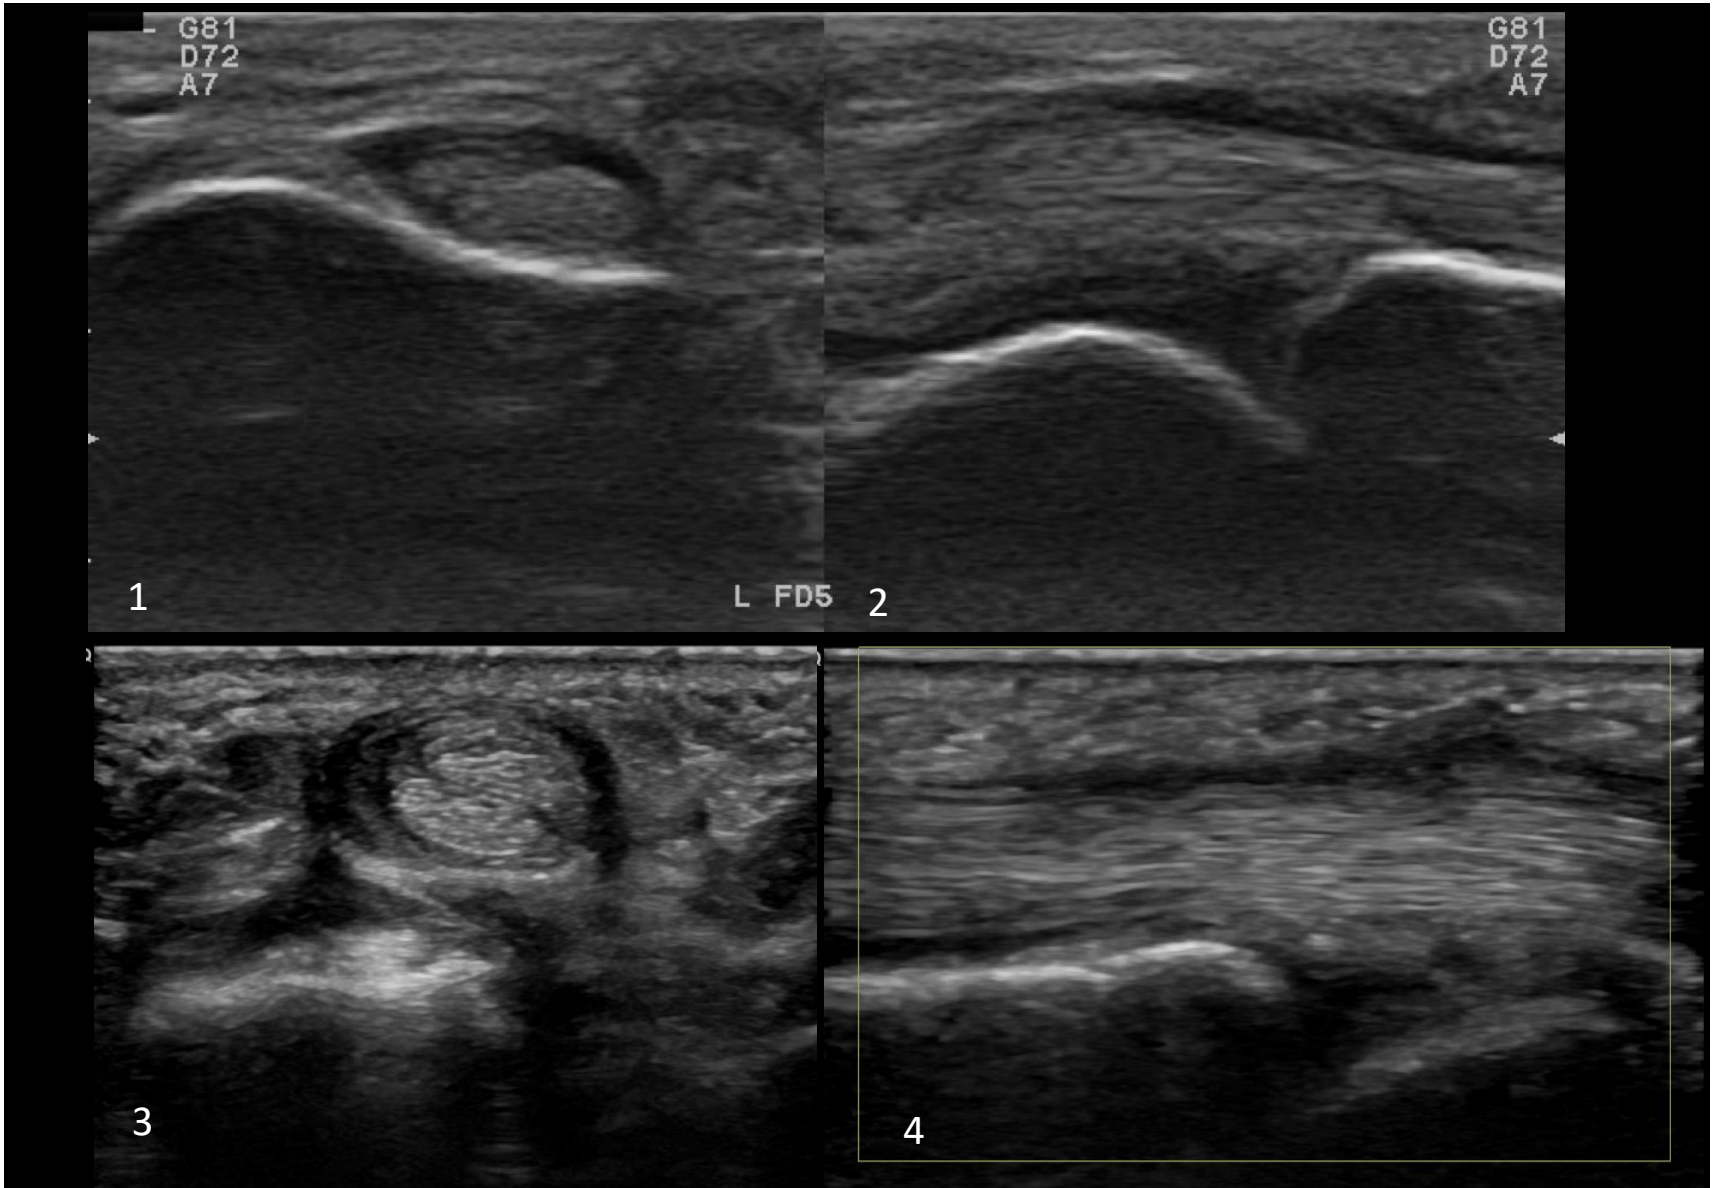

Supplement: annrheumdis-2021-219931supp001_data_supplement.pdf [file annrheumdis-2021-219931supp001_data_supplement.pdf]
